# Supplementary material
Source: PubMed Central journal article supplement (PMC8134061)
Supplement: mmc1.pdf [file mmc1.pdf]

# THE LANCET

## Diabetes & Endocrinology

### Supplementary appendix

This appendix formed part of the original submission and has been peer reviewed. We post it as supplied by the authors.

Supplement to: Gao M, Piernas C, Astbury N M, et al. Associations between body-mass index and COVID-19 severity in 6.9 million people in England: a prospective, community-based, cohort study. *Lancet Diabetes Endocrinol* 2021; published online April 28. [https://doi.org/10.1016/S2213-8587\(21\)00089-9](https://doi.org/10.1016/S2213-8587(21)00089-9).

## Supplementary Tables and Figures

|                                                                                                                                                                                                                                                   |   |
|---------------------------------------------------------------------------------------------------------------------------------------------------------------------------------------------------------------------------------------------------|---|
| Supplementary Figure 1. Study flow diagram.....                                                                                                                                                                                                   | 2 |
| Supplementary Table 1. Baseline characteristics of the study population by BMI group.....                                                                                                                                                         | 3 |
| Supplemental Table 2. Attributable risks and fractions in risk of severe COVID-19 outcomes associated with BMI across age groups.....                                                                                                             | 5 |
| Supplementary Figure 2. Associations of BMI with severe COVID-19 outcomes: sensitivity analysis using BMI measurements taken over the previous year (n=2,291,940).6                                                                               | 6 |
| Supplemental Table 3. Sensitivity analyses of BMI with severe COVID-19 outcomes excluding people with recorded BMI before 24 <sup>th</sup> January 2019, excluding people living in care homes and excluding people with missing covariates ..... | 7 |
| Supplemental Table 4. Baseline characteristics in people with vs without BMI recorded....                                                                                                                                                         | 8 |
| Supplemental Table 5. Risk of severe COVID-19 outcomes in people with vs without BMI recorded.....                                                                                                                                                | 9 |

Supplementary Figure 1. Study flow diagram.

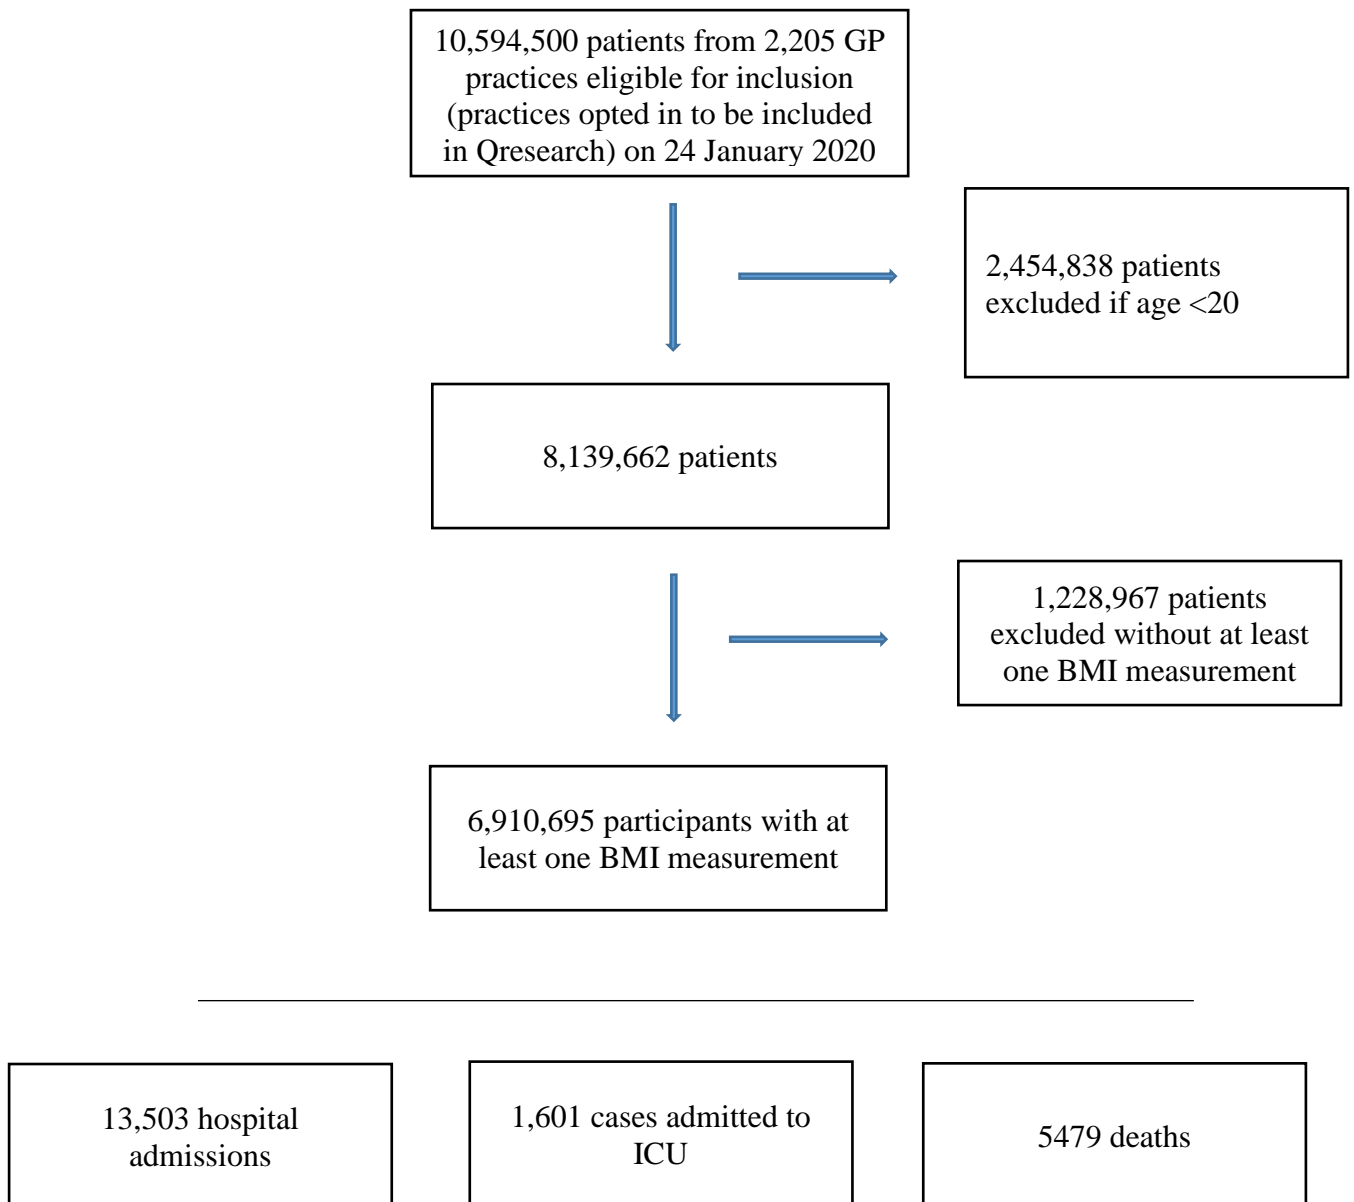

1. Hospital admission: defined as an having ICD-10 code in hospital record for either confirmed (U07.1) or suspected COVID-19 (U07.2) as primary or secondary cause, or new hospital admission associated with confirmed COVID-19 within 30 days of the test;
2. ICU Admission: defined as testing positive for SARS-CoV-2 and identified from ICNARC records;
3. Death: defined using ICD-10 codes on ONS death certificates for confirmed or suspected death from COVID-19 (primary or secondary cause).

Supplementary Table 1. Baseline characteristics of the study population by BMI group

|                                    | Underweight (<18.5) | Healthy weight (18.5 to <25) | Overweight (25 to <30) | Obesity I (30-34.9) | Obesity II/III (35+) |
|------------------------------------|---------------------|------------------------------|------------------------|---------------------|----------------------|
| <b>N</b>                           | 209497              | 2713189                      | 2306897                | 1072777             | 608335               |
| <b>COVID-19 Death</b>              | 275 (0.1%)          | 1871 (0.1%)                  | 1751 (0.1%)            | 964 (0.1%)          | 618 (0.1%)           |
| <b>COVID-19 hospital admission</b> | 362 (0.2%)          | 3655 (0.1%)                  | 4593 (0.2%)            | 2823 (0.3%)         | 2070 (0.3%)          |
| <b>COVID-19 ICU admission</b>      | 12 (<1%)            | 289 (<1%)                    | 513 (<1%)              | 421 (<1%)           | 366 (0.1%)           |
| <b>Exposures</b>                   |                     |                              |                        |                     |                      |
| BMI, mean (SD)                     | 17.31 (0.91)        | 22.30 (1.72)                 | 27.23 (1.41)           | 32.06 (1.41)        | 39.03 (3.27)         |
| Type 2 diabetes                    | 3801 (1.8%)         | 99801 (3.7%)                 | 195397 (8.5%)          | 155284 (14.5%)      | 122963 (20.2%)       |
| <b>Age group</b>                   |                     |                              |                        |                     |                      |
| 20-39                              | 141986 (67.8%)      | 1224605 (45.1%)              | 614919 (26.7%)         | 245552 (22.9%)      | 157161 (25.8%)       |
| 40-59                              | 31872 (15.2%)       | 837028 (30.9%)               | 885324 (38.4%)         | 432615 (40.3%)      | 257172 (42.3%)       |
| 60-79                              | 21997 (10.5%)       | 488263 (18.0%)               | 641918 (27.8%)         | 328949 (30.7%)      | 171488 (28.2%)       |
| 80+                                | 13642 (6.5%)        | 163293 (6.0%)                | 164736 (7.1%)          | 65661 (6.1%)        | 22514 (3.7%)         |
| <b>Gender</b>                      |                     |                              |                        |                     |                      |
| Men                                | 86418 (41.3%)       | 1168743 (43.1%)              | 1246326 (54.0%)        | 521641 (48.6%)      | 219259 (36.0%)       |
| <b>Ethnicity</b>                   |                     |                              |                        |                     |                      |
| White                              | 124525 (59.4%)      | 1846548 (68.1%)              | 1603035 (69.5%)        | 757697 (70.6%)      | 439852 (72.3%)       |
| Asian                              | 22408 (10.7%)       | 225424 (8.3%)                | 196989 (8.5%)          | 75465 (7.0%)        | 30332 (5.0%)         |
| Black                              | 6013 (2.9%)         | 76338 (2.8%)                 | 89859 (3.9%)           | 51579 (4.8%)        | 30718 (5.0%)         |
| Chinese                            | 6039 (2.9%)         | 43614 (1.6%)                 | 12308 (0.5%)           | 2315 (0.2%)         | 708 (0.1%)           |
| Others/Not recorded                | 50512 (24.1%)       | 521265 (19.2%)               | 404706 (17.5%)         | 185721 (17.3%)      | 106725 (17.5%)       |
| <b>Townsend deprivation scores</b> |                     |                              |                        |                     |                      |
| Quintile 1 (most affluent)         | 36570 (17.5%)       | 622503 (22.9%)               | 590534 (25.6%)         | 249995 (23.3%)      | 117785 (19.4%)       |
| Quintile 2                         | 38776 (18.5%)       | 577439 (21.3%)               | 537823 (23.3%)         | 248950 (23.2%)      | 133397 (21.9%)       |
| Quintile 3                         | 41325 (19.7%)       | 511735 (18.9%)               | 445519 (19.3%)         | 220533 (20.6%)      | 134479 (22.1%)       |
| Quintile 4                         | 43978 (21.0%)       | 486180 (17.9%)               | 381285 (16.5%)         | 190285 (17.7%)      | 122449 (20.1%)       |
| Quintile 5 (most deprived)         | 47883 (22.9%)       | 502361 (18.5%)               | 342341 (14.8%)         | 158901 (14.8%)      | 97952 (16.1%)        |
| Missing                            | 965 (0.5%)          | 12971 (0.5%)                 | 9395 (0.4%)            | 4113 (0.4%)         | 2273 (0.4%)          |
| <b>English Region</b>              |                     |                              |                        |                     |                      |
| East Midlands                      | 8560 (4.1%)         | 81371 (3.0%)                 | 54455 (2.4%)           | 24530 (2.3%)        | 13199 (2.2%)         |
| East of England                    | 7343 (3.5%)         | 97268 (3.6%)                 | 88219 (3.8%)           | 39851 (3.7%)        | 21325 (3.5%)         |
| London                             | 57656 (27.5%)       | 766163 (28.2%)               | 561607 (24.3%)         | 237393 (22.1%)      | 124160 (20.4%)       |
| North East                         | 5567 (2.7%)         | 61099 (2.3%)                 | 54449 (2.4%)           | 29564 (2.8%)        | 19034 (3.1%)         |
| North West                         | 35632 (17.0%)       | 438953 (16.2%)               | 421946 (18.3%)         | 213973 (19.9%)      | 126537 (20.8%)       |
| South Central                      | 25222 (12.0%)       | 359033 (13.2%)               | 319845 (13.9%)         | 143306 (13.4%)      | 81359 (13.4%)        |
| South East                         | 21572 (10.3%)       | 299497 (11.0%)               | 263525 (11.4%)         | 122151 (11.4%)      | 69155 (11.4%)        |
| South West                         | 20831 (9.9%)        | 280775 (10.3%)               | 228283 (9.9%)          | 106213 (9.9%)       | 62138 (10.2%)        |
| West Midlands                      | 18406 (8.8%)        | 235418 (8.7%)                | 232175 (10.1%)         | 114761 (10.7%)      | 67156 (11.0%)        |
| Yorkshire & Humber                 | 8708 (4.2%)         | 93612 (3.5%)                 | 82393 (3.6%)           | 41035 (3.8%)        | 24272 (4.0%)         |
| <b>Smoking</b>                     |                     |                              |                        |                     |                      |
| Non smoker                         | 123806 (59.1%)      | 1659427 (61.2%)              | 1340494 (58.1%)        | 604069 (56.3%)      | 343585 (56.5%)       |
| Ex-smoker                          | 25685 (12.3%)       | 520511 (19.2%)               | 592977 (25.7%)         | 301162 (28.1%)      | 169861 (27.9%)       |

|                                      |               |                |                |                |                |
|--------------------------------------|---------------|----------------|----------------|----------------|----------------|
| Light smoker                         | 39048 (18.6%) | 396915 (14.6%) | 276726 (12.0%) | 122360 (11.4%) | 68982 (11.3%)  |
| Moderate smoker                      | 7763 (3.7%)   | 79860 (2.9%)   | 57133 (2.5%)   | 26251 (2.4%)   | 14736 (2.4%)   |
| Heavy smoker                         | 3256 (1.6%)   | 35252 (1.3%)   | 29759 (1.3%)   | 14909 (1.4%)   | 8575 (1.4%)    |
| Missing                              | 9939 (4.7%)   | 21224 (0.8%)   | 9808 (0.4%)    | 4026 (0.4%)    | 2596 (0.4%)    |
| <b>Non-obesity related morbidity</b> |               |                |                |                |                |
| Asthma, COPD                         | 37294 (17.8%) | 388172 (14.3%) | 355495 (15.4%) | 192961 (18.0%) | 137895 (22.7%) |
| Autoimmune disease                   | 2044 (1.0%)   | 25797 (1.0%)   | 26093 (1.1%)   | 14838 (1.4%)   | 9707 (1.6%)    |
| Ulcerative colitis, Crohn's disease  | 2147 (1.0%)   | 27626 (1.0%)   | 24211 (1.0%)   | 10401 (1.0%)   | 5388 (0.9%)    |
| Type 1 diabetes                      | 770 (0.4%)    | 15344 (0.6%)   | 15569 (0.7%)   | 8101 (0.8%)    | 4464 (0.7%)    |
| Chronic liver disease                | 1237 (0.6%)   | 13015 (0.5%)   | 14658 (0.6%)   | 9727 (0.9%)    | 6029 (1.0%)    |
| Chronic renal disease                | 5896 (2.8%)   | 88120 (3.2%)   | 122569 (5.3%)  | 70310 (6.6%)   | 40268 (6.6%)   |
| Chronic neurological disease         | 10599 (5.1%)  | 87922 (3.2%)   | 76349 (3.3%)   | 36795 (3.4%)   | 20653 (3.4%)   |
| Cerebral palsy                       | 655 (0.3%)    | 2671 (0.1%)    | 1780 (0.1%)    | 942 (0.1%)     | 630 (0.1%)     |
| <b>Obesity related morbidity</b>     |               |                |                |                |                |
| Hypertension                         | 14586 (7.0%)  | 297058 (10.9%) | 504164 (21.9%) | 329420 (30.7%) | 217386 (35.7%) |
| CVD                                  | 7064 (3.4%)   | 111788 (4.1%)  | 161851 (7.0%)  | 89275 (8.3%)   | 45816 (7.5%)   |
| Sleep apnoea                         | 424 (0.2%)    | 8155 (0.3%)    | 22221 (1.0%)   | 25232 (2.4%)   | 35727 (5.9%)   |
| GORD                                 | 6570 (3.1%)   | 107232 (4.0%)  | 135576 (5.9%)  | 74866 (7.0%)   | 44245 (7.3%)   |
| Congestive Heart Failure             | 1888 (0.9%)   | 23741 (0.9%)   | 32289 (1.4%)   | 20919 (1.9%)   | 14854 (2.4%)   |
| Stroke                               | 3876 (1.9%)   | 52392 (1.9%)   | 64133 (2.8%)   | 32925 (3.1%)   | 16868 (2.8%)   |

\*Asian includes Indian, Pakistani, Bangladeshi, Other Asian; Black includes Black African.

\*\*Townsend scores were obtained for each patient as a proxy for socioeconomic status. Townsend scores are comparable with the index of multiple deprivation.

Supplemental Table 2. Attributable risks and fractions in risk of severe COVID-19 outcomes associated with BMI across age groups

In this analysis, we calculated the incidence of outcomes in the group who were aged  $\geq 80$  years of age and had a BMI of 23-23.9kg/m<sup>2</sup>. Severe COVID-19 is relatively markedly more common in older people. For this, we calculated the person-days of exposure and divided the incident cases of our outcomes (hospitalisation, ICU admission, and death) by the person-days of follow up. However, calculating the incidence rates in people with this particular BMI in younger age groups where outcomes were rare would be affected greatly by imprecision. We therefore calculated a modelled or expected incidence by applying the hazard ratio for age to the median age in each age group to the observed incidence in the population over 80 years. This gave us the expected incidence at the median age of each age group in people with a BMI of 23. Thereafter, we applied the hazard ratio for BMI for the BMIs shown in Table 3 (HR constant with age) or Figure 2 (HR differs by age) to the expected incidence of outcomes in each age group. The difference in modelled incidence rates between a BMI of 30, 35, or 40 and one of 23 is the attributable risk, interpreted as the number of additional cases/10,000 persons of severe COVID-19 in each age group at each BMI level. The attributable fraction is the difference in incidence between the exposed (people with BMI of 30, 35, or 40) and the unexposed (people with a BMI of 23) divided by the incidence in the exposed, and can be interpreted as the proportion of cases arising as a result of the exposure (BMI level). As an example, if we accept BMI has a causal association, 77% of the risk of needing hospitalisation for severe COVID-19 in people of 20-39 years with a BMI of 40 can be explained by BMI.

|                             |                                            | Attributable risks per 10,000 person-year |                             |                             |                             | Attributable fractions % per 10,000 person-year |                             |                             |                             |
|-----------------------------|--------------------------------------------|-------------------------------------------|-----------------------------|-----------------------------|-----------------------------|-------------------------------------------------|-----------------------------|-----------------------------|-----------------------------|
|                             |                                            | BMI 23<br>kg/m <sup>2</sup>               | BMI 30<br>kg/m <sup>2</sup> | BMI 35<br>kg/m <sup>2</sup> | BMI 40<br>kg/m <sup>2</sup> | BMI 23<br>kg/m <sup>2</sup>                     | BMI 30<br>kg/m <sup>2</sup> | BMI 35<br>kg/m <sup>2</sup> | BMI 40<br>kg/m <sup>2</sup> |
| COVID-19 Hospital admission | Incidence rate<br>per 10,000<br>population |                                           |                             |                             |                             |                                                 |                             |                             |                             |
| 20-39 years                 | 0.040                                      | 0                                         | 21                          | 46                          | 85                          | 0                                               | 45                          | 64                          | 77                          |
| 40-59 years                 | 0.120                                      | 0                                         | 49                          | 105                         | 187                         | 0                                               | 42                          | 60                          | 73                          |
| 60-79 years                 | 0.316                                      | 0                                         | 59                          | 113                         | 178                         | 0                                               | 24                          | 38                          | 49                          |
| 80+ years                   | 1.141                                      | 0                                         | 29                          | 50                          | 73                          | 0                                               | 7                           | 11                          | 16                          |
| COVID-19 ICU admission      |                                            |                                           |                             |                             |                             |                                                 |                             |                             |                             |
| 20-39 years                 | 0.005                                      | 0                                         | 2                           | 6                           | 12                          | 0                                               | 57                          | 77                          | 87                          |
| 40-59 years                 | 0.025                                      | 0                                         | 3                           | 8                           | 16                          | 0                                               | 52                          | 71                          | 83                          |
| 60-79 years                 | 0.049                                      | 0                                         | 2                           | 5                           | 8                           | 0                                               | 29                          | 44                          | 56                          |
| 80+ years                   | 0.025                                      | 0                                         | 5                           | 10                          | 16                          | 0                                               | 33                          | 50                          | 63                          |
| COVID-19 Death              |                                            |                                           |                             |                             |                             |                                                 |                             |                             |                             |
| 20-39 years                 | 0.001                                      | 0                                         | 3                           | 9                           | 21                          | 0                                               | 67                          | 85                          | 93                          |
| 40-59 years                 | 0.016                                      | 0                                         | 14                          | 35                          | 73                          | 0                                               | 57                          | 77                          | 87                          |
| 60-79 years                 | 0.121                                      | 0                                         | 16                          | 30                          | 46                          | 0                                               | 19                          | 30                          | 39                          |
| 80+ years                   | 0.765                                      | 0                                         | 0                           | 0                           | 0                           | 0                                               | 0                           | 0                           | 0                           |

Supplementary Figure 2. Associations of BMI with severe COVID-19 outcomes: sensitivity analysis using BMI measurements taken over the previous year (n=2,291,940)

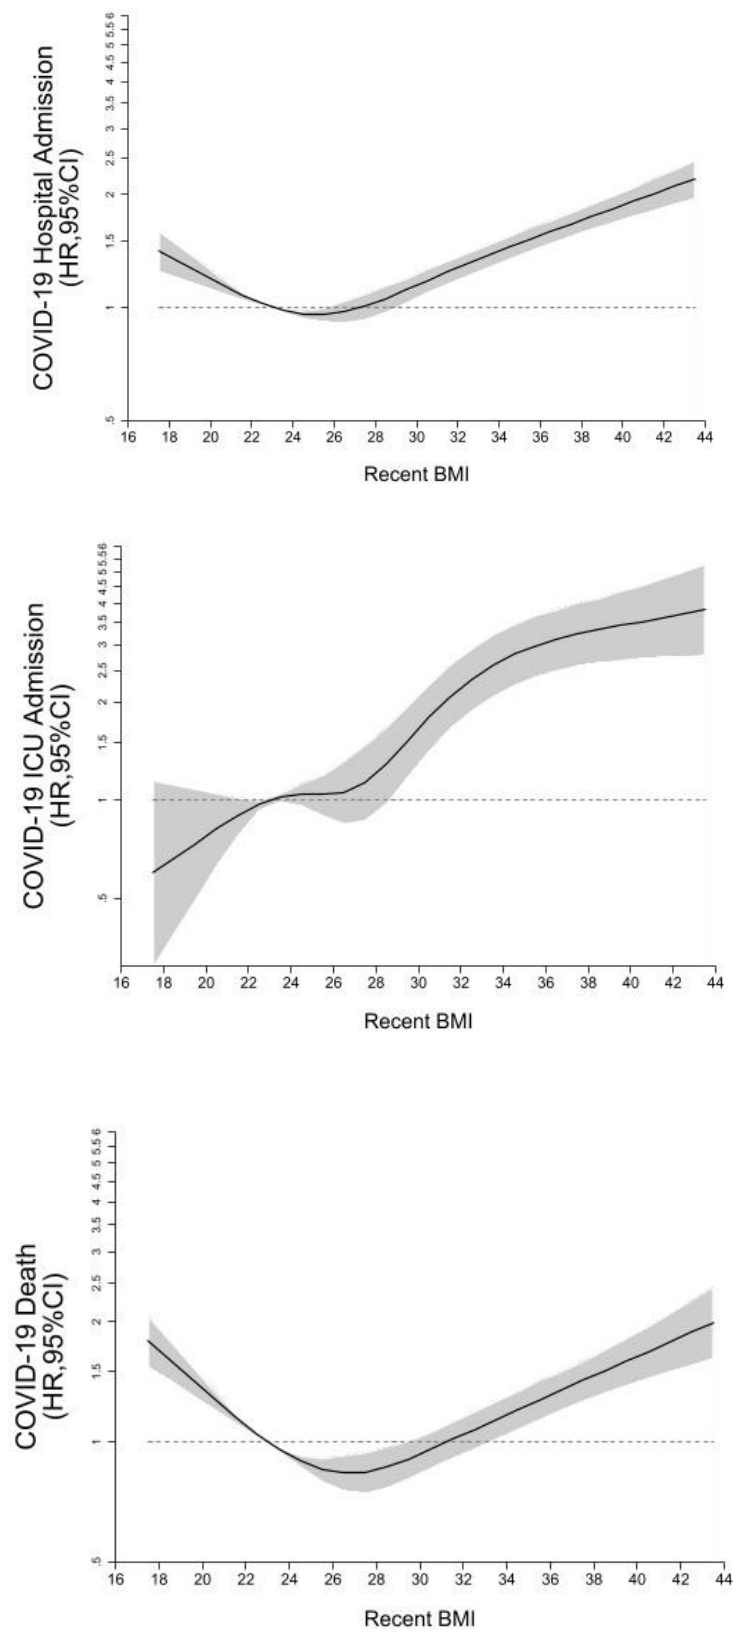

Supplemental Table 3. Sensitivity analyses of BMI with severe COVID-19 outcomes excluding people with recorded BMI before 24<sup>th</sup> January 2019, excluding people living in care homes and excluding people with missing covariates

| Outcomes                                                                                                                              | Recent BMI measurement<br>N=2,291,940 |                     | Excluding care home patients<br>N=6,865,469 |                     | Excluding patients with missing data<br>N=5,842,989 |                     |
|---------------------------------------------------------------------------------------------------------------------------------------|---------------------------------------|---------------------|---------------------------------------------|---------------------|-----------------------------------------------------|---------------------|
|                                                                                                                                       | Cases                                 | HR (95% CI)         | Cases                                       | HR (95% CI)         | Cases                                               | HR (95% CI)         |
| Hospital admission                                                                                                                    | 6,544                                 | 1.05 (1.04 to 1.05) | 12,384                                      | 1.05 (1.05 to 1.06) | 11,764                                              | 1.05 (1.05 to 1.05) |
| ICU admission                                                                                                                         | 780                                   | 1.08 (1.07 to 1.10) | 1,580                                       | 1.10 (1.09 to 1.11) | 1,407                                               | 1.09 (1.08 to 1.10) |
| Death                                                                                                                                 | 2,764                                 | 1.06 (1.04 to 1.07) | 4,116                                       | 1.06 (1.05 to 1.06) | 4,703                                               | 1.04 (1.04 to 1.05) |
| * For the analyses of recent BMI measurements, BMI restricted to nadir, found at BMI ≥25 for hospital admission, and BMI≥28 for death |                                       |                     |                                             |                     |                                                     |                     |
| **For exclusion of patients with missing covariates, people missing ethnicity, Townsend index and smoking were excluded               |                                       |                     |                                             |                     |                                                     |                     |



Supplemental Table 4. Baseline characteristics in people with vs without BMI recorded

|                                      | <b>Missing BMI</b> | <b>Not missing BMI</b> |
|--------------------------------------|--------------------|------------------------|
| <b>N</b>                             | <b>1,228,967</b>   | <b>6,910,695</b>       |
| Prediabetes                          | 20843 (1.7%)       | 669846 (9.7%)          |
| Type 2 diabetes                      | 11700 (1.0%)       | 577246 (8.4%)          |
| <b>Age group</b>                     |                    |                        |
| 20-39                                | 825116 (67.1%)     | 2384223 (34.5%)        |
| 40-59                                | 277557 (22.6%)     | 2444011 (35.4%)        |
| 60-79                                | 100780 (8.2%)      | 1652615 (23.9%)        |
| 80+                                  | 25514 (2.1%)       | 429846 (6.2%)          |
| <b>Gender</b>                        |                    |                        |
| Men                                  | 810088 (65.9%)     | 3242387 (46.9%)        |
| <b>Ethnicity</b>                     |                    |                        |
| White                                | 534375 (43.5%)     | 4771657 (69.0%)        |
| Asian                                | 71822 (5.8%)       | 550618 (8.0%)          |
| Black                                | 32625 (2.7%)       | 254507 (3.7%)          |
| Chinese                              | 16476 (1.3%)       | 64984 (0.9%)           |
| Others/Not recorded                  | 573669 (46.7%)     | 1268929 (18.4%)        |
| <b>Townsend deprivation</b>          |                    |                        |
| Quintile 1 (most affluent)           | 239935 (19.5%)     | 1617387 (23.4%)        |
| Quintile 2                           | 260228 (21.2%)     | 1536385 (22.2%)        |
| Quintile 3                           | 253970 (20.7%)     | 1353591 (19.6%)        |
| Quintile 4                           | 236990 (19.3%)     | 1224177 (17.7%)        |
| Quintile 5 (most deprived)           | 230245 (18.7%)     | 1149438 (16.6%)        |
| <b>Smoking</b>                       |                    |                        |
| Non smoker                           | 590633 (48.1%)     | 4071381 (58.9%)        |
| Ex-smoker                            | 135724 (11.0%)     | 1610196 (23.3%)        |
| Light smoker                         | 163217 (13.3%)     | 904031 (13.1%)         |
| Moderate smoker                      | 36570 (3.0%)       | 185743 (2.7%)          |
| Heavy smoker                         | 14043 (1.1%)       | 91751 (1.3%)           |
| Missing                              | 288780 (23.5%)     | 47593 (0.7%)           |
| <b>Non-obesity related morbidity</b> |                    |                        |
| Asthma, COPD                         | 95420 (7.8%)       | 1111817 (16.1%)        |
| Chronic renal disease                | 9603 (0.8%)        | 327163 (4.7%)          |
| <b>Obesity related morbidity</b>     |                    |                        |
| Hypertension                         | 45073 (3.7%)       | 1362614 (19.7%)        |
| CVD                                  | 14541 (1.2%)       | 415794 (6.0%)          |

Supplemental Table 5. Risk of severe COVID-19 outcomes in people with vs without BMI recorded

| COVID-19 Outcomes  | HR (95% CI)         |
|--------------------|---------------------|
| Hospital admission |                     |
| Not missing BMI    | 1 (ref)             |
| Missing BMI        | 1.01 (0.93 to 1.10) |
| ICU admission      |                     |
| Not missing BMI    | 1 (ref)             |
| Missing BMI        | 0.70 (0.56 to 0.88) |
| Death              |                     |
| Not missing BMI    | 1 (ref)             |
| Missing BMI        | 1.38 (1.20 to 1.59) |
